# Supplementary material for: C-Reactive Protein to Lymphocyte Ratio is associated with asthma risk:A Cross-Sectional Study
Source: Research Square preprint supplement (doi:10.21203/rs.3.rs-8150143/v1), 2026-01-19
Supplement: Supplementary file 1 [file 6d5fb52b6d368dcd4e136a62.docx]

Table S1 Association Between Ln Transformed CLR and asthma After Multiple Imputations of Missing Data Among Participants in the NHANES 1999–2010 Cycles

| **Variable** | **Tota** | **Event (%)** | **Crude Model** | | **Adjusted Model** | |
| --- | --- | --- | --- | --- | --- | --- |
| **OR (95% CI)** | **p-value** | **OR(95% CI)** | **p-value** |
| CLR | 27624 | 3351 (12.1) | 1.08 (1.06~1.1) | <0.001 | 1.06 (1.04~1.08) | <0.001 |
| CLR , Tertiles |  |  |  |  |  |  |
| T1 | 4442 | 487 (11) | 1(Ref) |  | 1(Ref) |  |
| T2 | 10996 | 1214 (11) | 1.01 (0.9~1.13) | 0.89 | 1.03 (0.92~1.16) | 0.623 |
| T3 | 12186 | 1650 (13.5) | 1.27 (1.14~1.42) | <0.001 | 1.15 (1.02~1.3) | 0.02 |
| *P* for trend |  |  |  | <0.001 |  | 0.005 |
